# Supplementary material for: Joint Display Study for Prediabetes Prevention in Urban Contexts and Behavioral Change of Thailand: A Mixed Methods Study
Source: Research Square preprint supplement (doi:10.21203/rs.3.rs-7091035/v1), 2025-09-15
Supplement: Supplementary file 1 [file 137eb21ea78494a6742f827f.docx]

**Supplementary File**

**Questionnaire on Perceptions of Intervention Functions and Self-Care Behaviors for Glycemic Management**

This supplementary file contains two self-report instruments used in Phase 2 of the study. The first section includes the questionnaire measuring participants’ perceptions of intervention functions based on the Behavior Change Wheel (BCW). The second section presents the self-care behavior scale for glycemic management.

**Section 1: Perceptions of Intervention Functions**

Please indicate whether you have received or experienced the following forms of support in the past month. (1 = Strongly Disagree, 2 = Disagree, 3 = Neutral, 4 = Agree, 5 = Strongly Agree)

**Education**

1. I received guidance on selecting healthy foods that are easily available in my urban area.

2. I was informed about how high-sugar snacks common in city vending machines affect blood sugar.

3. Health education materials reflected challenges of city life such as time pressure and commuting.

4. I learned about identifying low glycemic index foods in local supermarkets.

5. I received information on how sedentary office work contributes to diabetes risk.

**Training**

1. I practiced planning balanced meals based on foods available near my workplace.

2. I received training on preparing meals without needing a full kitchen.

3. I was shown how to read nutrition labels on ready-to-eat city foods.

4. I was guided in using health apps for tracking diet and physical activity.

5. I learned urban-friendly exercises that can be done in small spaces.

**Persuasion**

1. Messages from health professionals made me feel responsible for controlling my blood sugar.

2. Testimonials from other city dwellers inspired me to adopt healthy habits.

3. Campaigns in my workplace or neighborhood motivated me to eat less sugar.

4. I felt encouraged to make healthy choices after seeing peers succeed.

5. I received positive reinforcement from friends or colleagues about staying healthy.

**Incentivisation**

1. I participated in reward programs for physical activity or healthy eating.

2. Receiving praise or recognition encouraged me to maintain healthy habits.

3. Digital health tools offered rewards for reaching lifestyle goals.

4. I was more motivated when health programs included small incentives.

5. Discounts on healthy food options influenced my purchasing choices.

**Coercion**

1. I felt pressured by health staff to avoid unhealthy foods.

2. Health warnings about diabetes complications influenced my behavior.

3. I avoided sugary drinks due to negative social judgment.

4. Fear of disease made me more compliant with health advice.

5. My workplace promoted rules that discouraged unhealthy eating.

**Modelling**

1. I observed coworkers managing their diet and physical activity well.

2. Online influencers sharing urban health tips inspired my actions.

3. Family members’ healthy behaviors influenced my daily choices.

4. Seeing others exercise in public areas motivated me to join.

5. Community leaders participated in and promoted health activities.

**Enablement**

1. I received help accessing health resources through workplace programs.

2. Community health services helped me find time to exercise.

3. Support from colleagues made it easier to maintain a healthy lifestyle.

4. I was connected to digital tools that simplified healthy decision-making.

5. I received emotional support to cope with urban stress while managing health.

**Environmental Restructuring**

1. Healthy meals are available at or near my workplace.

2. My neighborhood has parks or fitness spaces I can access easily.

3. Posters and signs in my area promote healthy habits.

4. My office has wellness spaces or exercise options.

5. Urban health services are convenient and supportive of healthy routines.

**Restriction**

1. I removed sugary snacks from my daily routine to reduce temptation.

2. At home, we limited access to soft drinks and processed foods.

3. I unsubscribed from food delivery apps promoting unhealthy meals.

4. My workplace discouraged consumption of unhealthy food during work hours.

5. Family routines now exclude desserts or sweet drinks after dinner.

**Section 2: Self-Care Behaviors for Glycemic Management**

In the past month, how often did you engage in the following behaviors? (1 = Never, 2 = Rarely, 3 = Sometimes, 4 = Often, 5 = Always)

1. I chose foods that help control blood sugar (e.g., low-GI foods).

2. I limited my portion sizes during meals.

3. I avoided sugary snacks or desserts.

4. I drank water instead of sweetened beverages.

5. I engaged in at least 30 minutes of physical activity on most days.

6. I kept a regular eating schedule despite a busy urban lifestyle.

7. I checked nutrition labels before buying food.

8. I avoided late-night eating or skipped meals.

9. I prepared healthy meals at home or selected healthier options when eating out.

10. I avoided high-fat, high-sugar foods commonly found in convenience stores.
